# Supplementary material for: Succinic and citric acids production from renewable biomass (waste cooking oil and crude glycerol) through oleophilic yeast strain of Yarrowia lipolytica ATCC 20177
Source: Research Square preprint supplement (doi:10.21203/rs.3.rs-1415999/v1), 2022-03-08
Supplement: Supplementary file 1 [file 6ba4d6ee921da6e7668fbfec.docx]

**Supplementary table associated with Figure 3 (A) - Cultivation of *Yarrowia lipolytica* on Pure Glycerol:**

| **Time (h)** | **pH** | **Viability log10 (CFU/mL)** | **Viability SD** | **Biomass g/ L** | **Biomass SD** | **Citric acid g/L** | **Citric acid SD** | **Succinic acid g/L** | **Succinic acid SD** | **Residual glycerol g/L** | **Residual glycerol SD** |
| --- | --- | --- | --- | --- | --- | --- | --- | --- | --- | --- | --- |
| **0** | 5.05 | 4.06 | 0.08 | 0.89 | 0.02 | 0.78 | 0.01 | 2.61 | 0.01 | 107.58 | 0.80 |
| **24** | 5.15 | 4.29 | 0.05 | 1.01 | 0.01 | 0.82 | 0.01 | 2.73 | 0.01 | 99.93 | 0.14 |
| **45** | 5.03 | 4.53 | 0.13 | 1.10 | 0.00 | 1.02 | 0.01 | 6.49 | 0.04 | 69.94 | 1.57 |
| **48** | 5.13 | 4.65 | 0.08 | 1.11 | 0.01 | 1.02 | 0.03 | 6.56 | 0.02 |  |  |
| **72** | 5.12 | 4.75 | 0.04 | 1.10 | 0.01 | 1.10 | 0.01 | 8.32 | 0.06 | 63.53 | 1.94 |
| **96** | 5.2 | 4.72 | 0.05 | 1.29 | 0.02 | 1.52 | 0.00 | 9.40 | 0.04 | 56.45 | 1.27 |
| **116** | 5.18 | 4.73 | 0.03 | 1.30 | 0.01 | 1.62 | 0.02 | 11.42 | 0.04 |  |  |
| **120** | 5.18 | 4.77 | 0.04 | 1.29 | 0.01 | 1.65 | 0.01 | 11.72 | 0.10 | 32.63 | 0.53 |
| **139** | 5.16 | 4.84 | 0.07 | 1.39 | 0.01 | 1.66 | 0.00 | 12.64 | 0.11 |  |  |
| **144** | 5.15 | 4.79 | 0.04 | 1.71 | 0.01 | 1.68 | 0.01 | 12.72 | 0.02 | 11.95 | 1.52 |
| **162** | 5.15 | 4.72 | 0.05 | 1.82 | 0.02 | 1.73 | 0.04 | 13.48 | 0.06 | 6.90 | 0.95 |
| **168** | 5.14 | 4.67 | 0.03 | 1.90 | 0.01 | 1.76 | 0.05 | 14.10 | 0.02 |  |  |
| **186** | 5.1 | 4.56 | 0.06 | 2.05 | 0.06 | 2.40 | 0.06 | 15.13 | 0.06 | 4.29 | 1.79 |
| **192** | 5.12 | 4.51 | 0.04 | 2.62 | 0.02 | 2.40 | 0.02 | 13.79 | 0.30 | 3.88 | 1.24 |

The results are given as mean values of two replicates (standard deviations SD under 5%).

**Supplementary table associated with Figure 3 (B) - Cultivation of *Yarrowia lipolytica* on Crude Glycerol:**

| **Time (h)** | **pH** | **Viability log10 (CFU/mL)** | **Viability SD** | **Biomass g/ L** | **Biomass SD** | **Citric acid g/L** | **Citric acid SD** | **Succ. acid g/L** | **Succ. acid SD** | **Residual glycerol g/L** | **Residual glycerol SD** | **Oleic acid (%)** | **Oleic acid SD** | **Linoleic acid (%)** | **Linoleic acid SD** |
| --- | --- | --- | --- | --- | --- | --- | --- | --- | --- | --- | --- | --- | --- | --- | --- |
| **0** | 5.09 | 4.59 | 0.11 | 0.31 | 0.01 | 3.72 | 0.10 | 9.37 | 0.11 | 31.64 | 0.81 | 21.86 | 1.20 | 45.03 | 0.04 |
| **24** | 5.25 | 4.66 | 0.02 | 0.32 | 0.02 | 3.75 | 0.06 | 10.95 | 0.08 | 27.66 | 0.49 | 20.62 | 0.54 | 44.47 | 0.57 |
| **45** | 5.23 | 5.22 | 0.09 | 0.59 | 0.02 | 3.81 | 0.03 | 11.12 | 0.15 | 17.06 | 1.33 | 17.67 | 0.82 | 39.16 | 1.48 |
| **48** | 5.23 | 5.18 | 0.04 | 0.61 | 0.01 | 3.87 | 0.01 | 11.36 | 0.05 |  |  |  |  |  |  |
| **72** | 5.22 | 5.42 | 0.09 | 0.69 | 0.01 | 3.95 | 0.01 | 11.38 | 0.06 | 11.92 | 0.85 | 11.84 | 1.98 | 29.60 | 2.81 |
| **96** | 5.18 | 5.33 | 0.04 | 0.79 | 0.02 | 3.96 | 0.01 | 11.64 | 0.09 | 10.55 | 0.64 | 8.60 | 2.19 | 27.78 | 2.92 |
| **116** | 5.17 | 5.32 | 0.03 | 0.81 | 0.01 | 4.29 | 0.01 | 12.20 | 0.03 |  |  |  |  |  |  |
| **120** | 5.17 | 5.35 | 0.06 | 0.81 | 0.01 | 4.36 | 0.02 | 12.49 | 0.06 |  |  |  |  |  |  |
| **139** | 5.14 | 5.37 | 0.01 | 0.90 | 0.01 | 4.52 | 0.04 | 13.61 | 0.04 |  |  |  |  |  |  |
| **144** | 5.14 | 5.33 | 0.08 | 0.92 | 0.02 | 4.53 | 0.03 | 13.77 | 0.08 | 5.72 | 0.80 | 3.88 | 2.33 | 16.21 | 1.49 |
| **162** | 5.13 | 5.55 | 0.19 | 1.11 | 0.01 | 4.60 | 0.01 | 14.06 | 0.08 | 4.10 | 0.36 | 3.07 | 1.67 | 14.06 | 0.71 |
| **168** | 5.13 | 5.38 | 0.11 | 1.53 | 0.04 | 4.63 | 0.03 | 14.06 | 0.06 |  |  |  |  |  |  |
| **186** | 5.08 | 6.46 | 0.04 | 1.72 | 0.02 | 4.74 | 0.01 | 14.19 | 0.02 | 1.42 | 0.94 | 2.54 | 2.07 | 8.20 | 2.14 |
| **192** | 5.06 | 6.55 | 0.01 | 2.06 | 0.08 | 4.90 | 0.07 | 14.33 | 0.04 | 0.64 | 0.87 | 2.45 | 2.04 | 5.73 | 0.71 |

The results are given as mean values of two replicates (standard deviations SD under 5%).

**Supplementary table associated with Figure 3 (C) - Cultivation of *Yarrowia lipolytica* on Sunflower Waste Cooking Oil:**

| **Time (h)** | **pH** | **Viability log10 (CFU/mL)** | **Viability SD** | **Biomass g/ L** | **Biomass SD** | **Citric acid g/L** | **Citric acid SD** | **Succinic acid g/L** | **Succinic acid SD** | **Oleic acid %** | **Oleic acid SD** | **Linoleic acid %** | **Linoleic acid SD** |
| --- | --- | --- | --- | --- | --- | --- | --- | --- | --- | --- | --- | --- | --- |
| **0** | 5.06 | 5.60 | 0.92 | 1.17 | 0.08 | 1.90 | 0.04 | 8.09 | 0.21 | 40.19 | 0.07 | 74.09 | 0.08 |
| **24** | 5.04 | 6.30 | 0.51 | 1.34 | 0.05 | 2.01 | 0.01 | 9.45 | 0.80 | 38.22 | 0.62 | 72.97 | 0.22 |
| **45** | 5.07 | 6.89 | 0.30 | 1.44 | 0.03 | 2.07 | 0.03 | 11.00 | 0.36 | 35.85 | 0.45 | 71.42 | 0.58 |
| **48** | 5.07 | 6.94 | 0.23 | 1.51 | 0.02 | 2.11 | 0.02 | 11.56 | 0.10 |  |  |  |  |
| **72** | 5.25 | 7.13 | 0.03 | 2.73 | 0.13 | 2.17 | 0.01 | 14.65 | 0.11 | 35.15 | 0.43 | 61.00 | 0.23 |
| **96** | 5.25 | 7.13 | 0.09 | 3.01 | 0.06 | 2.56 | 0.15 | 14.98 | 0.06 | 34.37 | 0.71 | 60.53 | 0.14 |
| **116** | 5.22 | 7.28 | 0.04 | 3.15 | 0.05 | 2.90 | 0.04 | 15.33 | 0.07 |  |  |  |  |
| **120** | 5.21 | 7.30 | 0.00 | 3.73 | 0.11 | 2.95 | 0.06 | 16.47 | 0.16 |  |  |  |  |
| **139** | 5.22 | 7.53 | 0.23 | 4.07 | 0.12 | 3.19 | 0.06 | 17.32 | 0.08 |  |  |  |  |
| **144** | 5.2 | 7.88 | 0.43 | 4.60 | 0.08 | 3.23 | 0.04 | 17.44 | 0.05 | 21.64 | 0.51 | 44.65 | 0.57 |
| **162** | 5.24 | 8.36 | 0.13 | 4.78 | 0.04 | 3.34 | 0.04 | 18.23 | 0.08 | 19.45 | 0.42 | 43.91 | 0.16 |
| **168** | 5.25 | 8.53 | 0.11 | 5.57 | 0.21 | 3.41 | 0.05 | 18.50 | 0.11 |  |  |  |  |
| **186** | 5.31 | 9.71 | 0.13 | 6.46 | 0.12 | 3.44 | 0.02 | 20.42 | 0.18 | 11.14 | 0.45 | 27.70 | 0.43 |
| **192** | 5.33 | 10.35 | 0.29 | 8.15 | 0.23 | 3.50 | 0.04 | 20.99 | 0.16 | 6.78 | 0.79 | 25.79 | 1.06 |

The results are given as mean values of two replicates (standard deviations SD under 5%).
